# Supplementary material for: A discrete subtype of neural progenitor crucial for cortical folding in the gyrencephalic mammalian brain
Source: eLife. 2020 Apr 21;9:e54873. doi: 10.7554/eLife.54873 (PMC7173966; doi:10.7554/eLife.54873)
Supplement: Supplementary file 1. [file elife-54873-supp1.xlsx]

## Sheet: Table 
Supplementary file. Raw data for the quantification
	Figure 1F		HOPX+	HOPX-	Tbr2+	Pax6+	All
		#1	4.203	0.29	1.06	1.186	1.12
		#2	10.176	0.52	2.38	1.187	1.56
		#3	15.083	0.63	1.52	1.573	1.55
		Mean	9.821	0.48	1.651	1.316	1.405
		SD	4.448	0.14	0.545	0.182	0.204
	Figure 1G	#2		HOPX-/Tbr2-/Pax6+			HOPX+/Tbr2-/Pax6+			Tbr2+
			#1	33.9			10.1			55.99
			#2	64.41			4.8			30.79
			#3	50			3.51			46.49
			Mean	49.44			6.14			44.43
			SD	12.46			2.85			10.39
		#3	#1	8.74			38.04			53.22
			#2	21.45			31.45			47.09
			#3	20.23			34.22			45.56
			Mean	16.81			34.57			48.62
			SD	5.73			2.7			3.31
	Figure 1I	HOPX+					HOPX-
		#1	#2	#3	Mean	SD	#1	#2	#3	Mean	SD
		26.23	28.79	35.87	30.3	4.08	28.12	38.71	30	32.28	4.61
	Figure 1K	HOPX+					HOPX-
		#1	#2	#3	Mean	SD	#1	#2	#3	Mean	SD
		29.63	20.56	16.35	22.18	5.54	13.04	14.29	10	12.44	1.8
	Figure 1M	HOPX+					HOPX-
		#1	#2	#3	Mean	SD	#1	#2	#3	Mean	SD
		8.47	7.69	7.11	7.76	0.56	4.76	3.57	0	2.78	2.02
	Figure 1- figure supplement 1A		HOPX+	HOPX-	Tbr2+	Pax6+	All
		#1	27.4615	0.306189	1.85	1.52	1.66724
		#2	22.6	0.355805	1.24126	1.21	1.2238
		#3	9.51515	0.350148	2.09375	1.23	1.55556
		Mean	19.8589	0.337381	1.72834	1.32	1.4822
		SD	7.57863	0.0221766	0.358503	0.14	0.188317
	Figure 1- figure supplement 1B	#2		HOPX-/Tbr2-/Pax6+			HOPX+/Tbr2-/Pax6+			Tbr2+
			#1	52.66			2.23			45.11
			#2	47.42			1.78			50.8
			#3	56.73			5.56			37.71
			Mean	52.27			3.19			44.54
			SD	3.81			1.68			5.39
		#5	#1	9.67			36.73			53.6
			#2	13.79			32.8			53.41
			#3	12.77			33.98			53.25
			Mean	12.076			34.5			53.42
			SD	1.75			1.65			0.144
	Figure 2D		Pax6+/Tbr2-		Pax6-/Tbr2-		Tbr2+
		#1	0.5238		0.3333		0.1429
		#2	0.7273		0.2121		0.0606
		#3	0.7037		0.2593		0.037
		Mean	0.6516		0.2682		0.0802
		SD	0.0909		0.0499		0.0454
	Figure 2E		HOPX+		HOPX-
		#1	1		0
		#2	0.875		0.125
		#3	0.8947		0.1053
		Mean	0.9232		0.0768
		SD	0.0549		0.0549
	Figure 2G	Control					HhipΔC22
		#1	#2	#3	Mean	SD	#1	#2	#3	Mean	SD
		18.68	21.92	30.08	23.56	4.8	13.46	13.21	15.79	14.15	1.16
	Figure 2I	Control					HhipΔC22
		#1	#2	#3	Mean	SD	#1	#2	#3	Mean	SD
		41.44	34.43	22.35	32.74	7.88	25	25.49	29.46	26.65	2
	Figure 2J	Control					HhipΔC22
		#1	#2	#3	Mean	SD	#1	#2	#3	Mean	SD
		6.25	15.38	12.5	11.38	3.81	15	11.81	11.02	12.61	1.72
	Figure 2L	Control					HhipΔC22
		#1	#2	#3	Mean	SD	#1	#2	#3	Mean	SD
		29.35	30.68	26.04	28.69	1.95	28.6	30	30	29.52	0.67
	Figure 2N	Control					HhipΔC22
		#1	#2	#3	Mean	SD	#1	#2	#3	Mean	SD
		35.9	33.33	40.11	36.45	2.79	36.87	38.74	29.64	35.08	3.92
	Figure 2O	Control					HhipΔC22
		#1	#2	#3	Mean	SD	#1	#2	#3	Mean	SD
		27.27	32.61	26.58	28.82	2.69	20.31	27.06	28.09	25.15	3.45
	Figure 3C			Control					Shh-N
				#1	#2	#3	Mean	SD	#1	#2	#3	Mean	SD
		ISVZ		0.99	0.92	1.23	1.05	0.13	1.73	1.6	1.8	1.71	0.08
		OSVZ		1.09	0.83	1.08	1	0.12	1.69	3.33	2.11	2.38	0.7
	Figure 3E			Control					Shh-N
				#1	#2	#3	Mean	SD	#1	#2	#3	Mean	SD
		ISVZ		1.07	1.03	1.41	1.17	0.17	1.27	1.65	1	1.31	0.27
		OSVZ		0.93	0.75	1.32	1	0.24	1.27	1.06	1.6	1.31	0.22
	Figure 3G			Control					Shh-N
				#1	#2	#3	Mean	SD	#1	#2	#3	Mean	SD
		ISVZ		0.89	1.1	1.29	1.09	0.16	1.33	1.43	1.17	1.31	0.11
		OSVZ		1.11	1.29	0.78	1.06	0.21	1.11	1.59	1.5	1.4	0.21
	Figure 3H				Control					Shh-N
					#1	#2	#3	Mean	SD	#1	#2	#3	Mean	SD
		HOPX-Tbr2-Pax6+			12.26	19.41	10.98	14.22	3.71	16.05	24.08	10.48	16.87	5.58
		HOPX+Tbr2-Pax6+			39.08	39.41	36.42	38.3	1.34	48.56	48.44	53.54	50.18	2.38
		Tbr2+			48.66	41.18	52.6	47.48	4.74	35.39	27.48	35.98	32.95	3.88
	Figure 4C			Control					HhipΔC22
				#1	#2	#3	Mean	SD	#1	#2	#3	Mean	SD
		ISVZ		1.13	0.87	1.1	1.03	0.12	0.5	0.55	0.61	0.55	0.04
		OSVZ		1.09	1.05	0.92	1.02	0.07	0.41	0.52	0.45	0.46	0.04
	Figure 4E				Control					HhipΔC22
					#1	#2	#3	Mean	SD	#1	#2	#3	Mean	SD
		HOPX-Tbr2-Pax6+			15.5	16.4	11.94	14.61	1.93	21.81	23.87	29.7	25.13	3.34
		HOPX+Tbr2-Pax6+			38	40.8	43.55	40.78	2.27	4.94	19.36	19.14	14.48	6.75
		Tbr2+			46.5	42.8	44.5	44.61	1.51	73.25	56.76	51.16	60.39	9.38
	Figure 4- figure supplement 1			Control					HhipΔC22
				#1	#2	#3	Mean	SD	#1	#2	#3	Mean	SD
		ISVZ		1	1.67	0.25	0.97	0.58	1	0	0.5	0.5	0.41
		OSVZ		0.86	1.5	1	1.12	0.28	0.33	0.13	1.3	0.57	0.49
	Figure 4- figure supplement 2B	Control					Shh-N
		#1	#2	#3	Mean	SD	#1	#2	#3	Mean	SD
		0	2.56	0	0.85	1.21	0	0	3.33	1.11	1.57
	Figure 4- figure supplement 2C	Control					HhipΔC22
		#1	#2	#3	Mean	SD	#1	#2	#3	Mean	SD
		1.89	0	0	0.63	0.89	0	0	1.59	0.53	0.75
	Figure 5B				Control					Shh-N
					#1	#2	#3	Mean	SEM	#1	#2	#3	#4	Mean	SEM
		Local GN ratio			0.94	0.89	1.08	0.97	0.05	1.39	1.36	1.31	1.64	1.42	0.06
	Figure 5E				Control					HhipΔC22
					#1	#2	#3	Mean	SEM	#1	#2	#3	Mean	SEM
		Local GN ratio			1	1.17	1	1.06	0.05	1	1	1	1	0
		Local SD ratio			1.19	1.12	0.77	1.03	0.11	0.5	0.39	0.44	0.44	0.03
		Local GS ratio			0.93	0.98	0.67	0.86	0.08	0.7	0.45	0.55	0.57	0.06
	Figure 5F				Control					Shh-N
					#1	#2	#3	Mean	SD	#1	#2	#3	Mean	SD
		Layer 2/3			1.19	1.17	0.833	1.07	0.16	2.41	1.86	2.44	2.24	0.27
		Layer 4			0.93	1.2	0.84	0.99	0.15	0.96	0.85	1.07	0.96	0.09
		Layer 5			0.88	1	0.96	0.95	0.05	1.13	1.32	1.13	1.19	0.09
		Layer 6			0.93	0.92	1	0.95	0.04	0.9	1.27	1.04	1.07	0.15
	Figure 5G				Control					Shh-N
					#1	#2	#3	Mean	SD	#1	#2	#3	Mean	SD
		Upper/lower			1.27	1.13	0.72	1.04	0.23	2.69	1.8	1.8	2.1	0.42
	Figure 5H				Control					HhipΔC22
					#1	#2	#3	Mean	SD	#1	#2	#3	Mean	SD
		Layer 2/3			0.86	0.9	1	0.92	0.06	0.78	0.63	0.76	0.72	0.06
		Layer 4			0.63	0.95	1.11	0.9	0.2	1.13	0.89	0.89	0.97	0.12
		Layer 5			0.88	1	1.14	1.01	0.11	0.94	1.14	0.91	1	0.1
		Layer 6			1.03	0.92	1.2	1.05	0.12	0.86	1.09	0.95	0.96	0.1
	Figure 5I				Control					HhipΔC22
					#1	#2	#3	Mean	SD	#1	#2	#3	Mean	SD
		Upper/lower			0.93	0.95	1.01	0.96	0.03	0.83	0.61	0.83	0.76	0.1
	Figure 6C		Ferret		Mouse
		#1	0.0659		0.043
		#2	0.0979		0.0279
		#3	0.1029		0.0397
		Mean	0.0889		0.0369
		SD	0.0164		0.0065
	Figure 6F		Ferret		Mouse
		#1	0.65		0.23
		#2	0.74		0.25
		#3	0.35		0.41
		Mean	0.58		0.3
		SD	0.16		0.08
	Figure 6I		Mouse		Ferret
		#1	0.09		0.34
		#2	0.11		0.36
		#3	0.11		0.25
		Mean	0.1		0.32
		SD	0.01		0.05
	Figure 6J		Mouse		Ferret
		#1	0.3		0.52
		#2	0.12		0.4
		#3	0.11		0.27
		Mean	0.18		0.39
		SEM	0.05		0.06
